# Supplementary material
Source: PubMed Central journal article supplement (PMC4163538)
Supplement: NIHMS600166-supplement-1.pdf [file NIHMS600166-supplement-1.pdf]

**Supplementary Table S1. Primers used in qPCR and ChIP Analysis.**

**Cyclin D1 ChIP QPCR**

5'- AATGCACAGCGTAGTATTCAGGAA-3'  
5'- GCCTTCGTATGTGTGTGTTAAGCTA-3'

**c-myc ChIP QPCR**

5'- CTTAACACACACATACGAAGGCA-3'  
5'- GGACAAACCCAAGCTTTCCC-3'

**Survivin ChIP QPCR**

5'- CAGATGGGTGAGGATCCAAATGCT-3'  
5'- CAATCAGGCCACTGTTTGATGTCC-3'

**Cyclin D1 QPCR**

5'- TGC GTGCAGAAGGAGATTGT-3'  
5'- CTCACAGACCTCCAGCATCCA-3'

**Myc QPCR**

5'- CCTAGTGCTGCATGAGGAGACA-3'  
5'- CCTCATCTTCTTGCTCTTCTTCAGA-3'

**Survivin QPCR**

5'- TGACAACCCGATAGAGGAGCATA-3'  
5'- CATCTGCTTCTTGACAGTGAGGAA-3'

**MMP-9 QPCR**

5'-AGACGTGGGTCGATTCCAAACCTT -3'  
5'- TCGCGCAAGTCTTCAGAGTAGTT-3'

**$\beta$ -catenin QPCR**

5'-CACGCAAGAGCAAGTAGCTGAT-3'  
5'-GCAGCTCGGACCCTCTGA-3'

**18S rRNA QPCR**

5'- AGTCCCTGCCCTTTGTACACA-3'  
5'- CGATCCGAGGGCCTCACTA-3'

**Supplementary Table S2. Comparison of Expression of the Wnt Pathway Genes by PCR Array using *Sirt2* WT and KO MEFs.**

| Genes     | Fold Up- or Down- Regulation<br><i>Sirt2</i> KO MEFs / <i>Sirt2</i> WT MEFs |
|-----------|-----------------------------------------------------------------------------|
| Cyclin D1 | 5.5                                                                         |
| Fos11     | 23.1                                                                        |
| Fzd8      | -6.0                                                                        |
| Jun       | 3.2                                                                         |
| Lef1      | 14.0                                                                        |
| Myc       | 2.4                                                                         |
| Nkd1      | -45.8                                                                       |
| Pitx2     | -145.1                                                                      |
| Pygo1     | -7.4                                                                        |
| Sfrp4     | -48.2                                                                       |
| Tcf7      | 3.3                                                                         |
| Tl31      | -9.3                                                                        |

Values are relative to the *Sirt2* WT cells that are assigned 1.0.
